# Supplementary material
Source: MDPI journal article supplement (https://www.mdpi.com/2073-4433/13/5/715)
Supplement: s1 [file s1]

# Evaluating the Impact of Planetary Boundary Layer, Land Surface Model, and Microphysics Parameterization Schemes on Simulated GOES-16 Water Vapor Brightness Temperatures

Sarah M. Griffin \* and Jason A. Otkin

Cooperative Institute for Meteorological Satellite Studies, University of Wisconsin-Madison,  
Madison, WI 53706, USA; jasono@ssec.wisc.edu

\* Correspondence: sarah.griffin@ssec.wisc.edu

**Table S1.** Names and abbreviations of all cities.

| <b>Municipalities or province</b> | <b>Cities in Hebei Province</b> | <b>Cities in Henan Province</b> | <b>Cities in Jiangsu Province</b> | <b>Cities in Anhui Province</b> | <b>Cities in Shandong Province</b> |
|-----------------------------------|---------------------------------|---------------------------------|-----------------------------------|---------------------------------|------------------------------------|
| Beijing City                      | Shijiazhuang City               | Zhengzhou City                  | Lianyungang City                  | Huainan City                    | Jinan City                         |
| Tianjin City                      | Handan City                     | Kaifeng City                    | Suqian City                       | Huaibei City                    | Qingdao City                       |
| Hebei Province                    | Xingtai City                    | Pingdingshan City               | Huai'an City                      | Suzhou City                     | Zibo City                          |
| Henan Province                    | Baoding City                    | Jiaozuo City                    | Yancheng City                     | Bozhou City                     | Zaozhuang City                     |
| ShanDong Province                 | Tangshan City                   | Hebi City                       | Xuzhou City                       | Bengbu City                     | Dongying City                      |
| AnHui Province                    | Qinhuangdao City                | Xinxiang City                   |                                   | Fuyang City                     | Yantai City                        |
| JiangSu Province                  | Cangzhou City                   | Anyang City                     |                                   |                                 | Weifang City                       |
|                                   | Hengshui City                   | Puyang City                     |                                   |                                 | Jining City                        |
|                                   | Langfang City                   | Xuchang City                    |                                   |                                 | Taian City                         |
|                                   |                                 | Luohe City                      |                                   |                                 | Weihai City                        |
|                                   |                                 | Nanyang City                    |                                   |                                 | Rizhao City                        |
|                                   |                                 | Shangqiu City                   |                                   |                                 | Linyi City                         |
|                                   |                                 | Xinyang City                    |                                   |                                 | Dezhou City                        |
|                                   |                                 | Zhoukou City                    |                                   |                                 | Liaocheng City                     |
|                                   |                                 | Zhumadian City                  |                                   |                                 | Binzhou City                       |
|                                   |                                 |                                 |                                   |                                 | Heze City                          |
